# Supplementary material for: An Assessment of De-globalization's Impact on MNC Pharma Profitability in Egypt
Source: Research Square preprint supplement (doi:10.21203/rs.3.rs-8602724/v1), 2026-01-22
Supplement: Supplementary file 1 [file 8bf3d7c50b7d22e0025f9d92.docx]

**An Assessment of De-globalization's Impact on MNC Pharma Profitability in Egypt**

Doaa Mohamed Salman

Professor of financial economics, October University for modern sciences and arts, Egypt

[dsalman@msa.edu.eg](mailto:dsalman@msa.edu.eg)

orcid.org/0000-0001-5050-6104

Menna Mahmoud El Gendy

Arab Academy for science, technology and maritime transport, Egypt

[menna.elgendy00@gmail.com](mailto:menna.elgendy00@gmail.com)

Cherine Soliman

Arab Academy for science, technology and maritime transport, Egypt

[cherine.soliman.aagsb@gmail.com](mailto:cherine.soliman.aagsb@gmail.com)
